# Supplementary material for: Expression regulation of genes is linked to their CpG density distributions around transcription start sites
Source: Life Sci Alliance. 2022 May 17;5(9):e202101302. doi: 10.26508/lsa.202101302 (PMC9113945; doi:10.26508/lsa.202101302)
Supplement: Supplementary file 1 [file LSA-2021-01302_TableS1.xlsx]

## Sheet: Sheet1
Number	Cell type	Data type	Accession
1	HepG2	ChIP-seq data of 208 chromain associated proteins	GSE104247
2		Expression data	GSM4133281
3	GM12878	MNase-seq data	ENCODE
4	liver, cortex, hippocampus, lung, left ventricle, spleen, ovary, adrenal, aorta, pancreas	Hi-C data	GSE87112
5		Expression data	https://zenodo.org/record/838734
6	2-cell, 8-cell, ICM, hES	Expression data	GSE101571
7	liver(E066), lung(E096), ovary(E097), sigmoid colon(E106)	Expression data	ENCODE
8		WGBS
9		ChIP-seq (H3K4me3, H3K9me3, H3K27me3, H3K36me3)
10	BLCA, BRCA, COAD, HNSC, KICH, KIRC, KIRP, LIHC, LUAD, LUSC, PRAD, STAD, THCA, UCEC	Expression data	TCGA
11	brca5, coad2, lusc4, ucec5	WGBS	TCGA
12	liver	Bio-CAP	GSE43512
